# Supplementary material
Source: Royal Society of Chemistry journal article supplement (doi:10.1039/d6ta03166h)
Supplement: d6ta03166h1.pdf [file d6ta03166h1.pdf]

## Supplementary file

### **Tip-Concentrated Electric Fields Steer Hydroxide Migration to Suppress Cathodic Scaling in Urchin-Like $\text{Ni}_x\text{Mo}_y\text{-MoO}_2$ for Seawater Electrolysis**

*Laixing Luo<sup>a</sup>, Jingyi Yuan<sup>a</sup>, Wu Qin<sup>a,\*</sup>, Zongming Zheng<sup>a,\*</sup>, Xianbin Xiao<sup>a,b</sup>*

<sup>a</sup> School of New Energy, North China Electric Power University, Beijing 102206, China

<sup>b</sup> Shanxi Research Institute of Huairou Laboratory, Taiyuan 030032, China

\* Corresponding author: [qinwu@ncepu.edu.cn](mailto:qinwu@ncepu.edu.cn); [zmzheng@ncepu.edu.cn](mailto:zmzheng@ncepu.edu.cn)

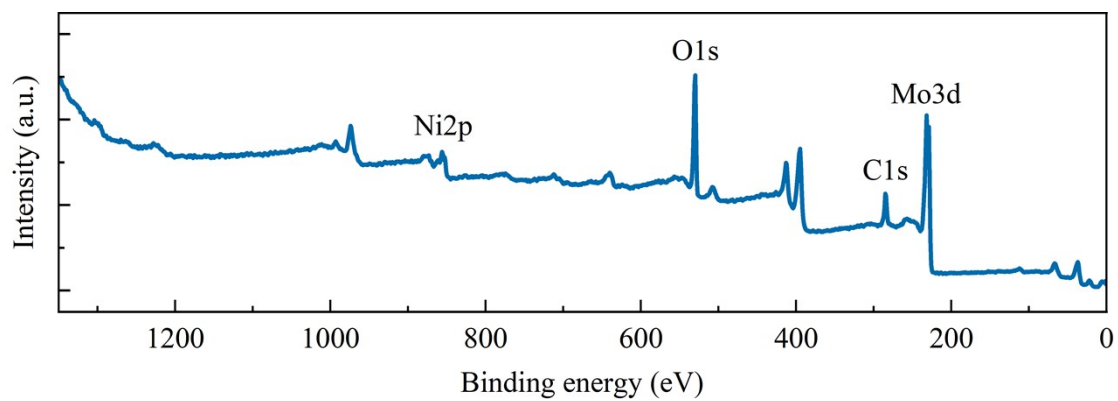

**Figure S1.** X-ray Photoelectron Spectroscopy (XPS) analysis of  $\text{Ni}_x\text{Mo}_y\text{-MoO}_2@\text{NF}$ .

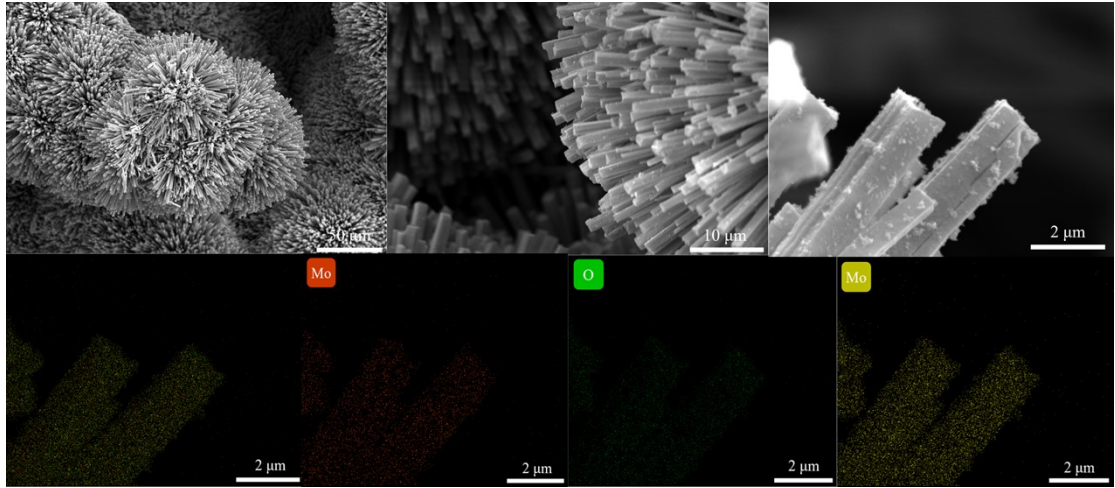

**Figure S2.** Scanning electron microscopy and energy dispersive spectroscopy (SEM-EDS) elemental mapping of NiMoO<sub>x</sub>@NF.

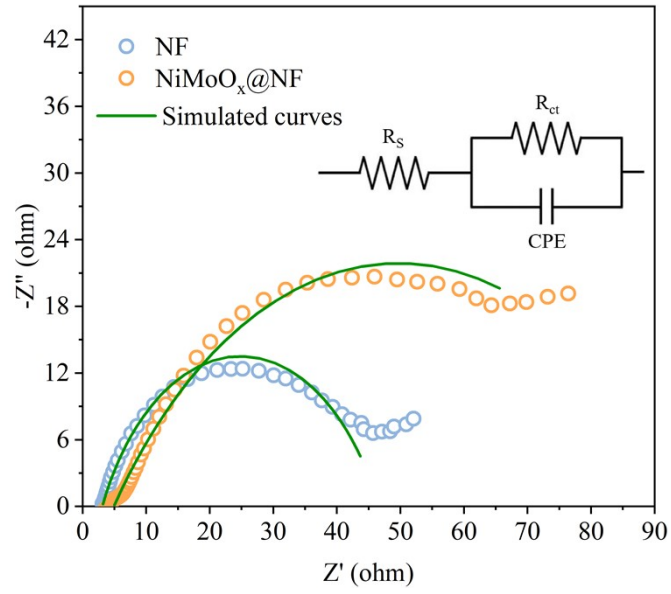

**Figure S3.** Electrochemical impedance spectroscopy (EIS) plots of nickel foam (NF) and NiMoO<sub>x</sub>@NF.

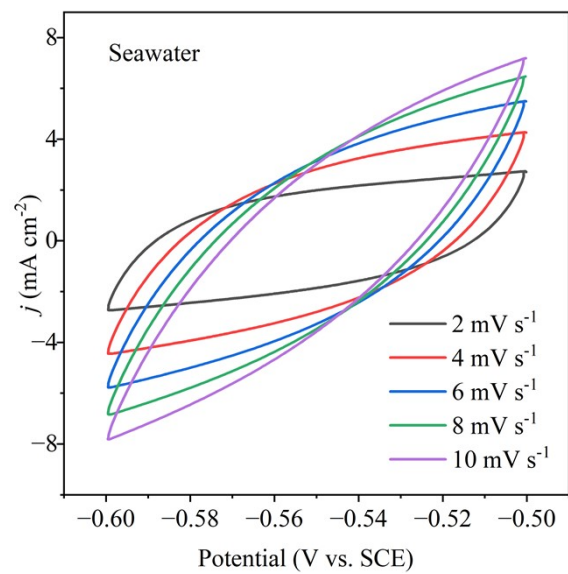

**Figure S4.** Cyclic voltammetry (CV) curves at various scan rates within the non-Faradaic potential region for Ni<sub>x</sub>Mo<sub>y</sub>-MoO<sub>2</sub>@NF in natural seawater.

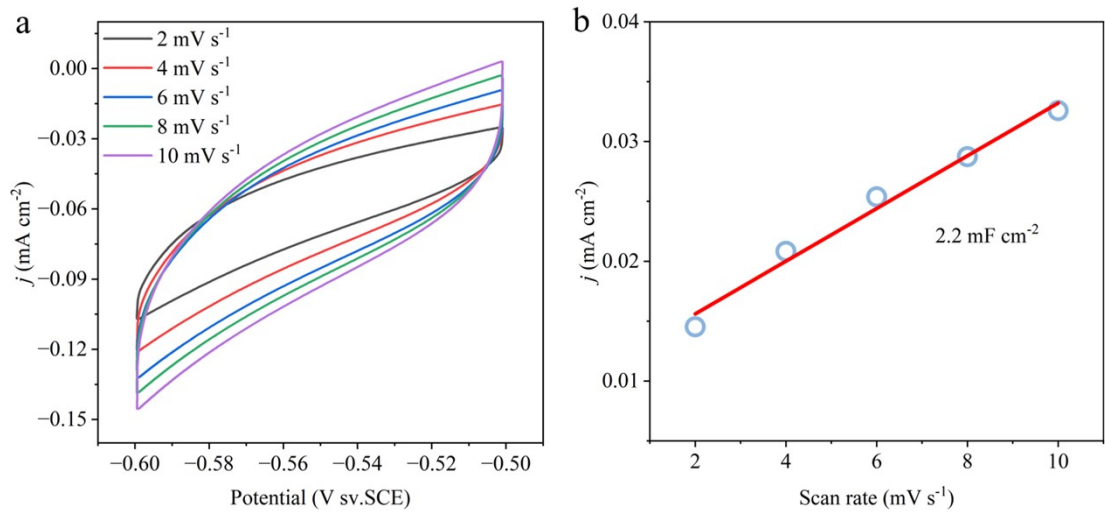

**Figure S5.** CV curves at various scan rates within the non-Faradaic potential region and the double-layer capacitance (*C*<sub>dl</sub>) curves of NiMoO<sub>x</sub>@NF in natural seawater.

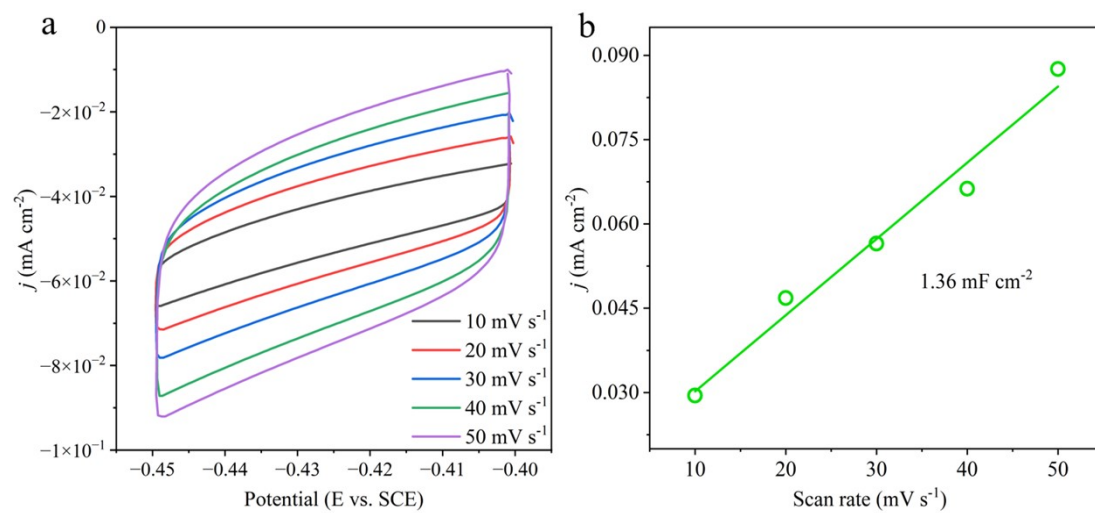

**Figure S6.** CV curves at various scan rates within the non-Faradaic potential region and the  $C_{dl}$  curves of NF in natural seawater.

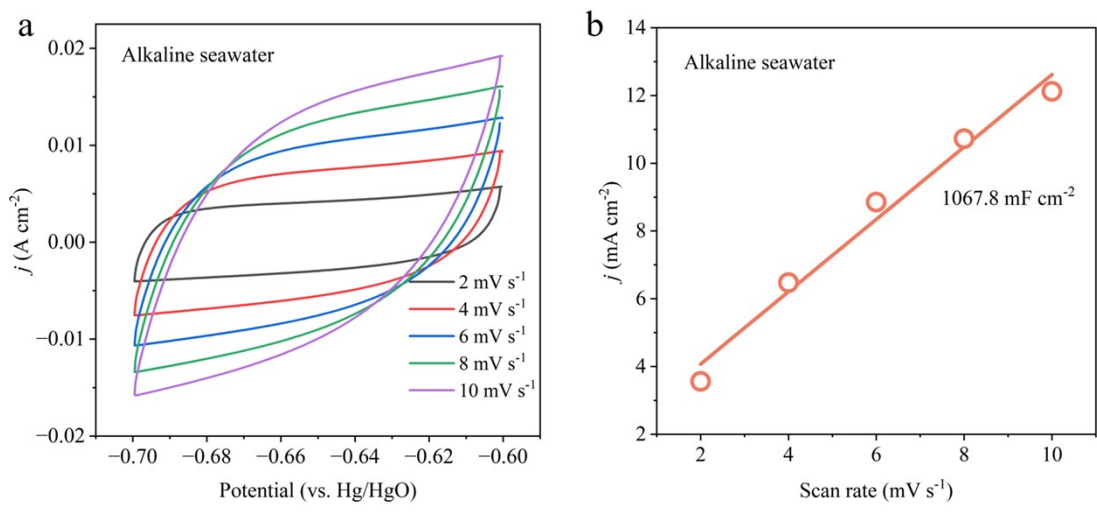

**Figure S7.** CV curves at various scan rates within the non-Faradaic potential region and the  $C_{dl}$  curves of  $\text{Ni}_x\text{Mo}_y\text{-MoO}_2\text{@NF}$  in alkaline seawater.

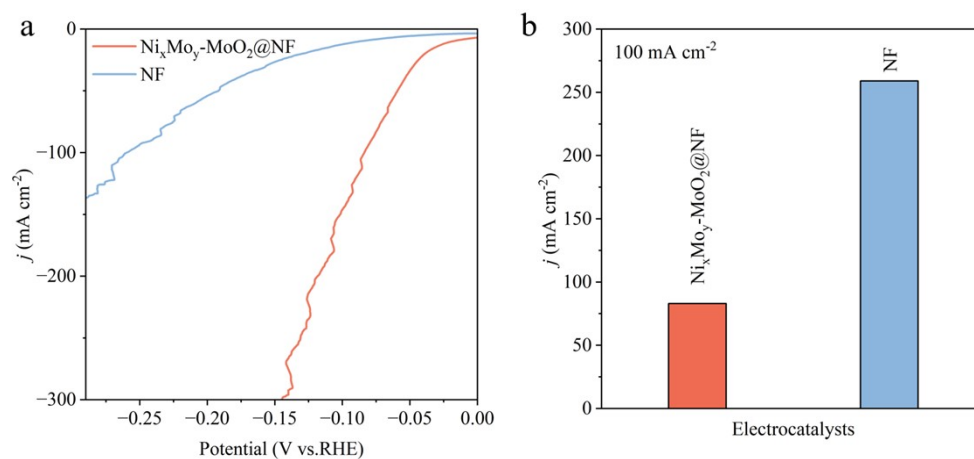

**Figure S8.** Linear sweep voltammetry (LSV) curves of NF and Ni<sub>x</sub>Mo<sub>y</sub>-MoO<sub>2</sub>@NF electrodes in alkaline seawater.

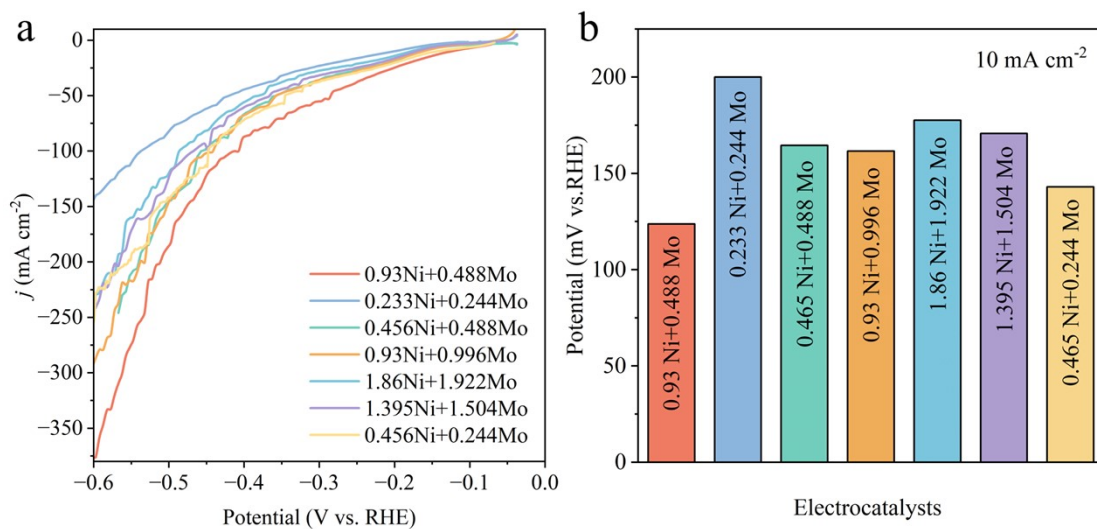

**Figure S9.** LSV curves of Ni<sub>x</sub>Mo<sub>y</sub>-MoO<sub>2</sub>@NF electrodes hydrothermally prepared in solutions with different concentrations of nickel and molybdenum salts.

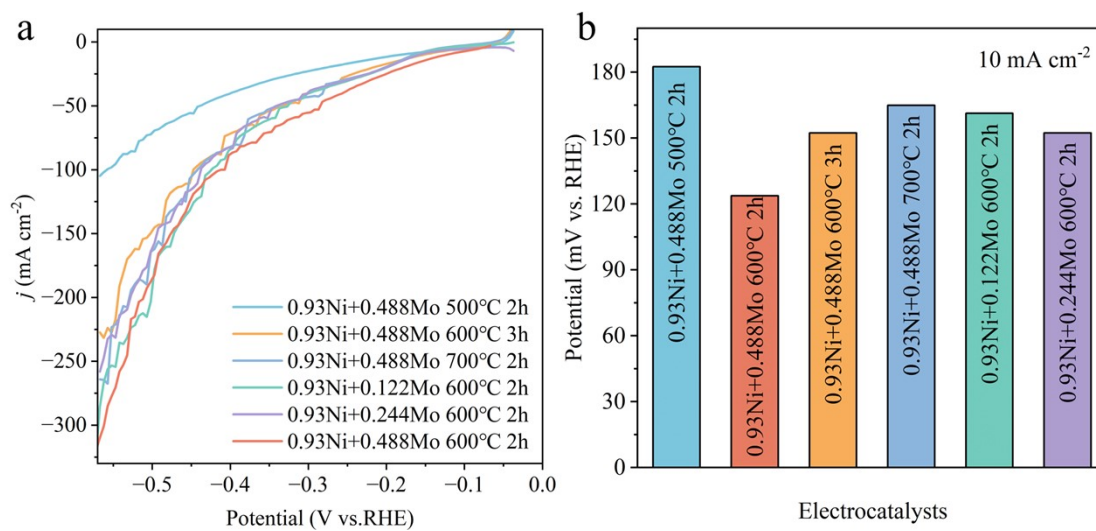

**Figure S10.** LSV curves of Ni<sub>x</sub>Mo<sub>y</sub>-MoO<sub>2</sub>@NF electrodes prepared at different annealing temperatures and durations.

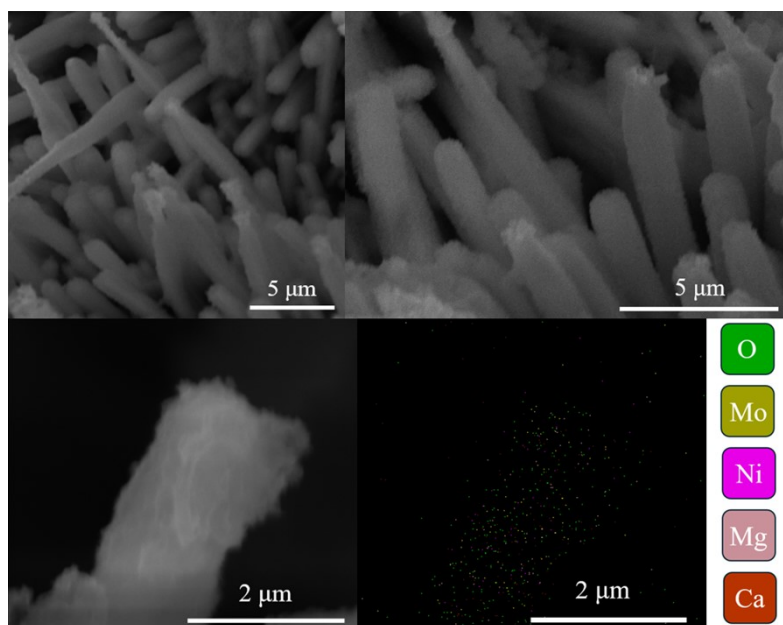

**Figure S11.** SEM images and EDS elemental mapping of  $\text{Ni}_x\text{Mo}_y\text{-MoO}_2\text{@NF}$  after the stability test.

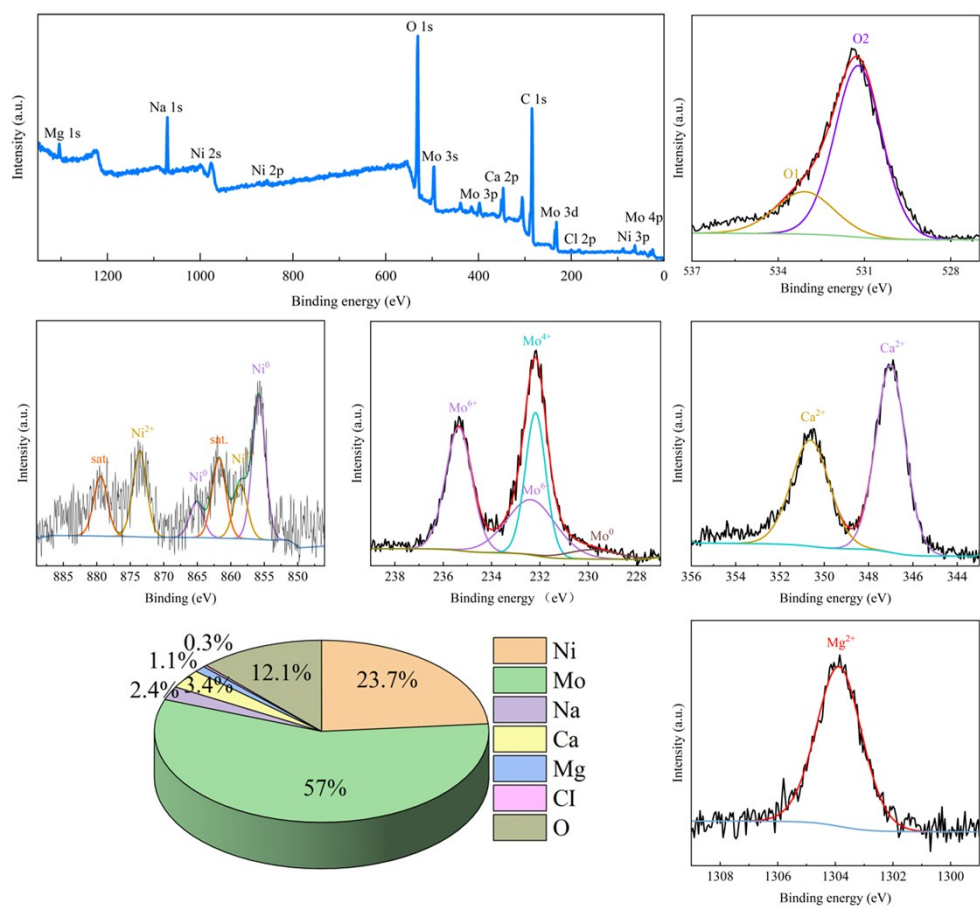

**Figure S12.** XPS spectra of  $\text{Ni}_x\text{Mo}_y\text{-MoO}_2\text{@NF}$  after the stability test.

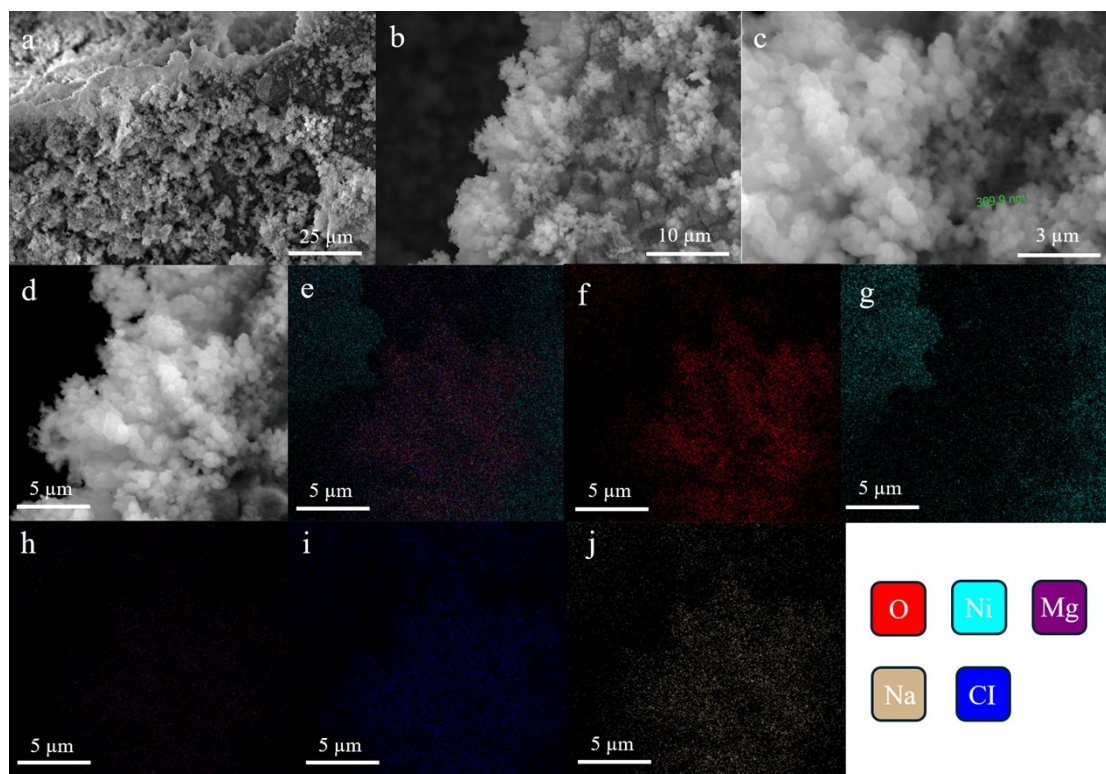

**Figure S13.** SEM images and EDS analysis of NF after the stability test. Corresponding EDS elemental mappings of (f) O, (g) Ni, (h) Mg, (i) Cl, and (j) Na for NF.

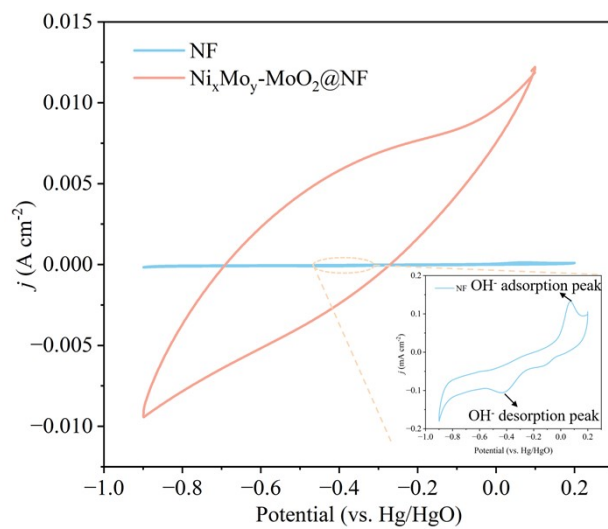

**Figure S14.** Analysis of the OH<sup>-</sup> desorption peaks in a 1 M NaOH solution.

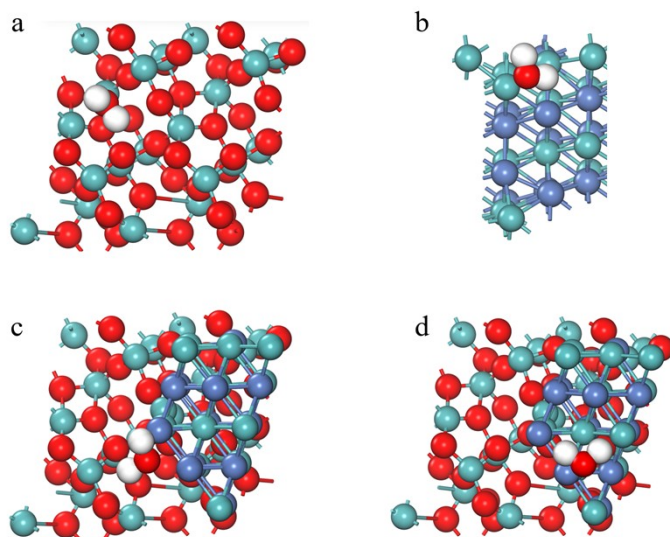

**Figure S15.** The optimized calculation models of water adsorption on (a) MoO<sub>2</sub>, (b) NiMo, (c) Ni<sub>x</sub>Mo<sub>y</sub>-MoO<sub>2</sub> (MoO<sub>2</sub>) and (d) Ni<sub>x</sub>Mo<sub>y</sub>-MoO<sub>2</sub> (NiMo).

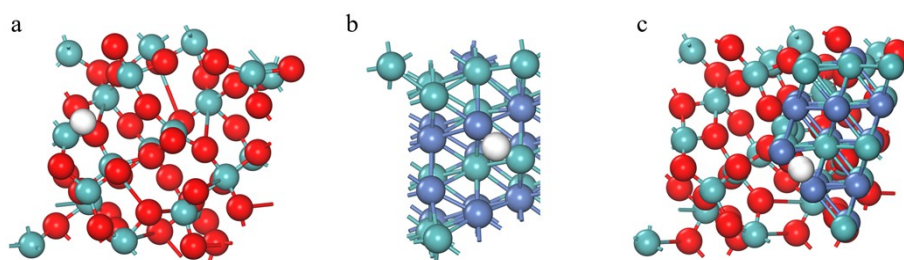

**Figure S16.** The optimized calculation models of H<sup>+</sup> adsorption on (a) MoO<sub>2</sub>, (b) NiMo and (c) Ni<sub>x</sub>Mo<sub>y</sub>-MoO<sub>2</sub>.

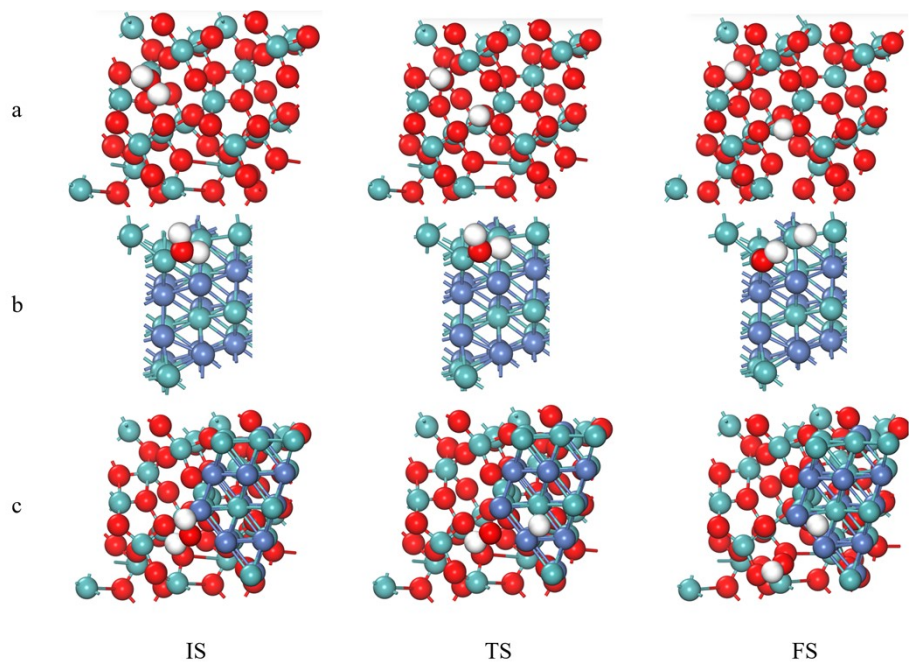

**Figure S17.** The reaction pathway of water dissociation for (a) MoO<sub>2</sub>, (b) NiMo and (c) Ni<sub>x</sub>Mo<sub>y</sub>-MoO<sub>2</sub>.

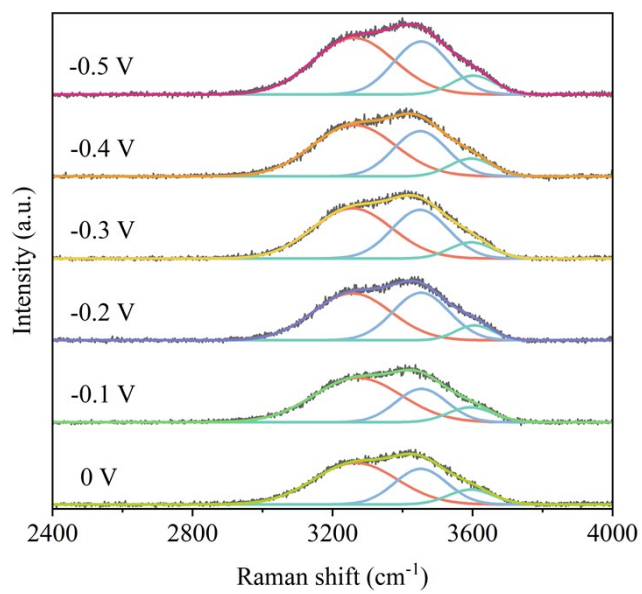

**Figure S18.** *In situ* Raman spectra of NF.

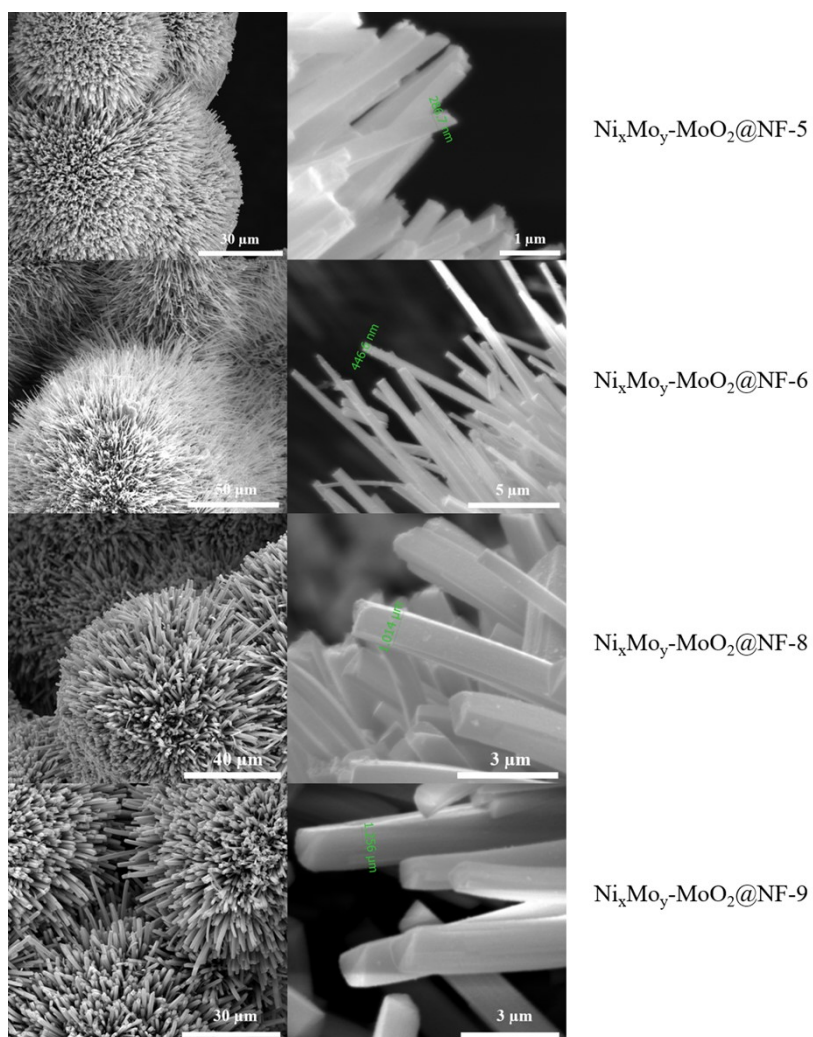

**Figure S19.** SEM images of  $\text{Ni}_x\text{Mo}_y\text{-MoO}_2\text{@NF}$  synthesized under various pH conditions.

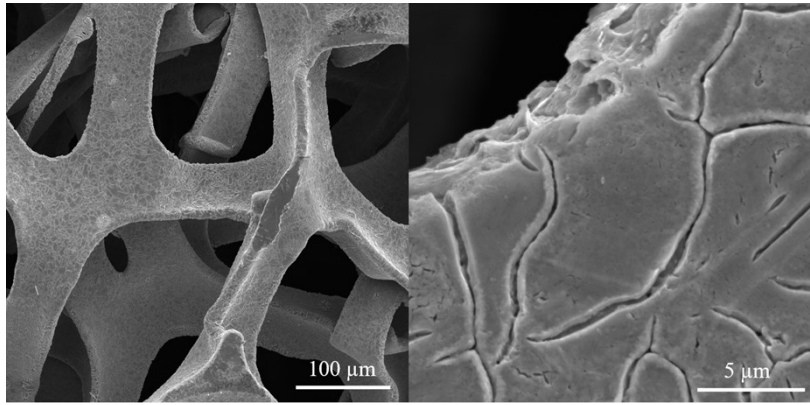

**Figure S20.** SEM images of Ni<sub>x</sub>Mo<sub>y</sub>-MoO<sub>2</sub>@NF-4.

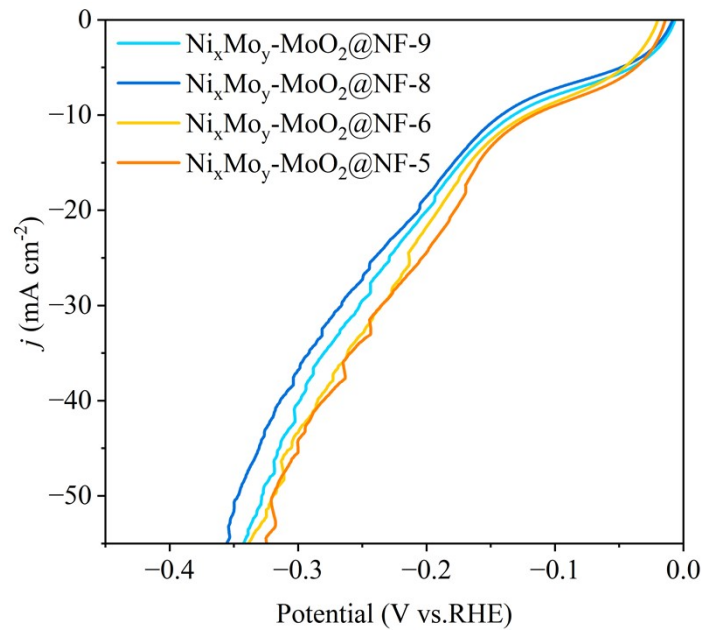

**Figure S21.** LSV curves of Ni<sub>x</sub>Mo<sub>y</sub>-MoO<sub>2</sub>@NF synthesized under various pH conditions.

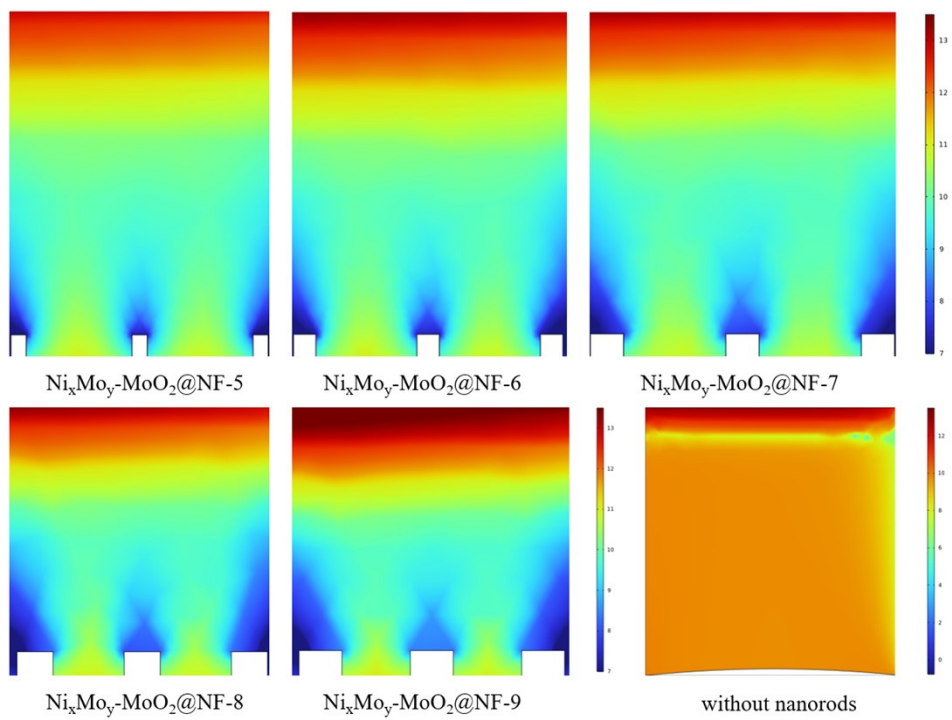

**Figure S22.** Distribution maps of the localized pH on the electrode surface.

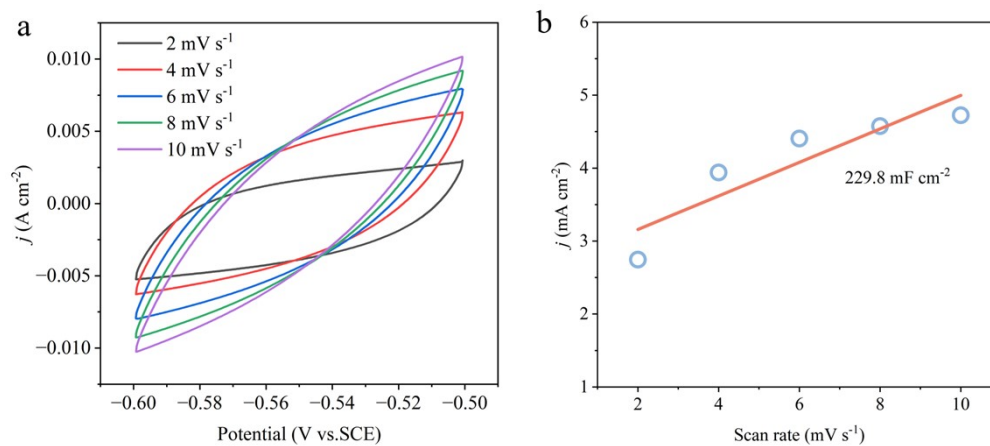

**Figure S23.** CV curves at various scan rates within the non-Faradaic potential region and the  $C_{dl}$  curves of  $\text{Ni}_x\text{Mo}_y\text{-MoO}_2\text{@NF-5}$  in natural seawater.

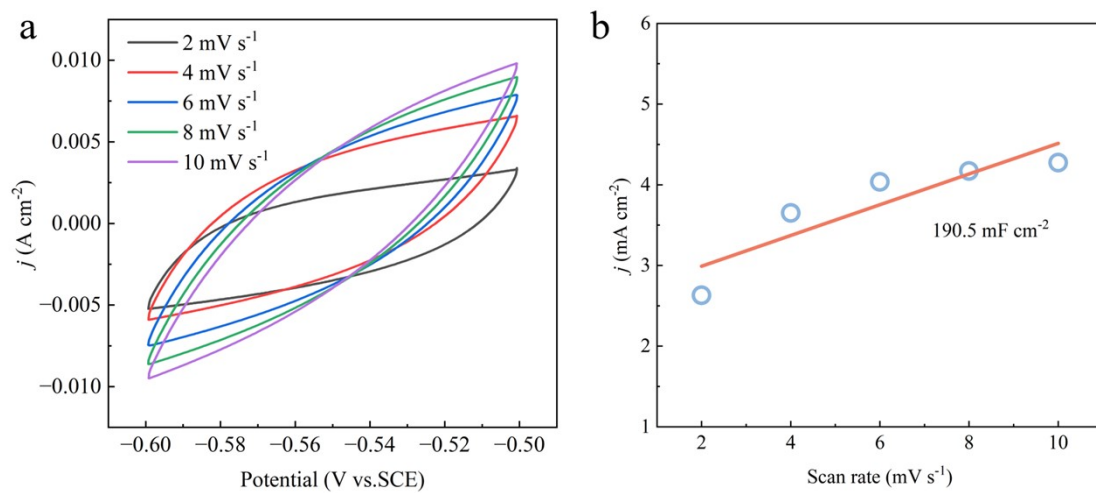

**Figure S24.** CV curves at various scan rates within the non-Faradaic potential region and the  $C_{dl}$  curves of  $\text{Ni}_x\text{Mo}_y\text{-MoO}_2\text{@NF-6}$  in natural seawater.

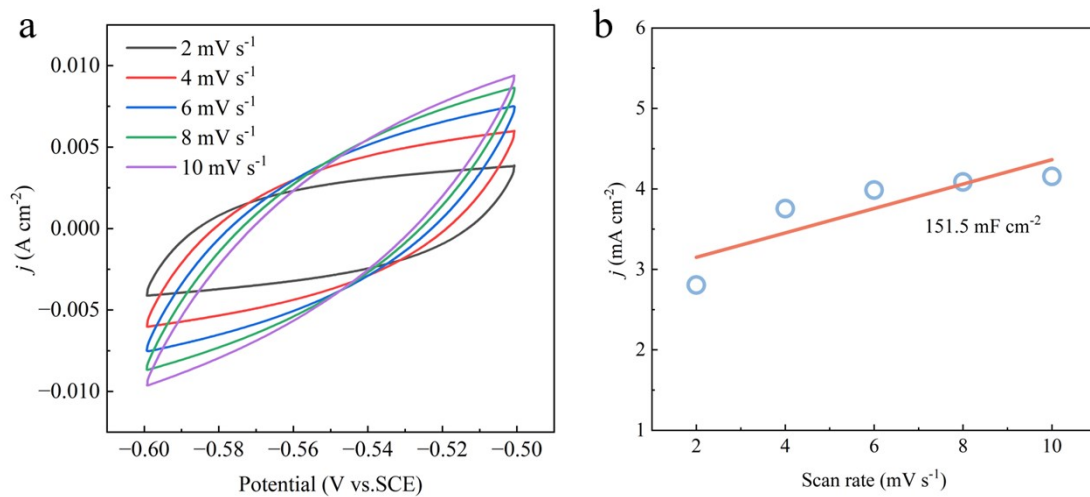

**Figure S25.** CV curves at various scan rates within the non-Faradaic potential region and the  $C_{dl}$  curves of  $\text{Ni}_x\text{Mo}_y\text{-MoO}_2\text{@NF-8}$  in natural seawater.

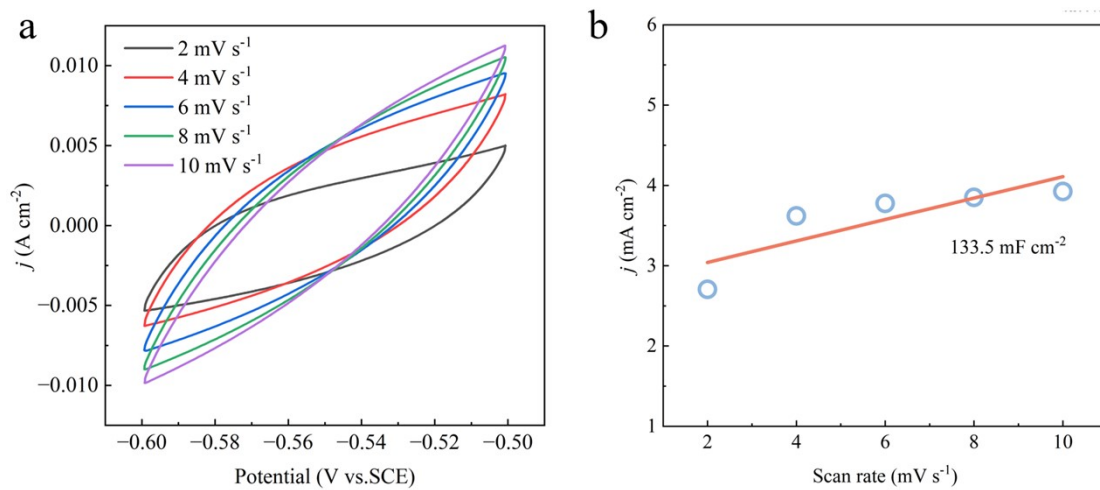

**Figure S26.** CV curves at various scan rates within the non-Faradaic potential region and the  $C_{dl}$  curves of  $\text{Ni}_x\text{Mo}_y\text{-MoO}_2@\text{NF-9}$  in natural seawater.

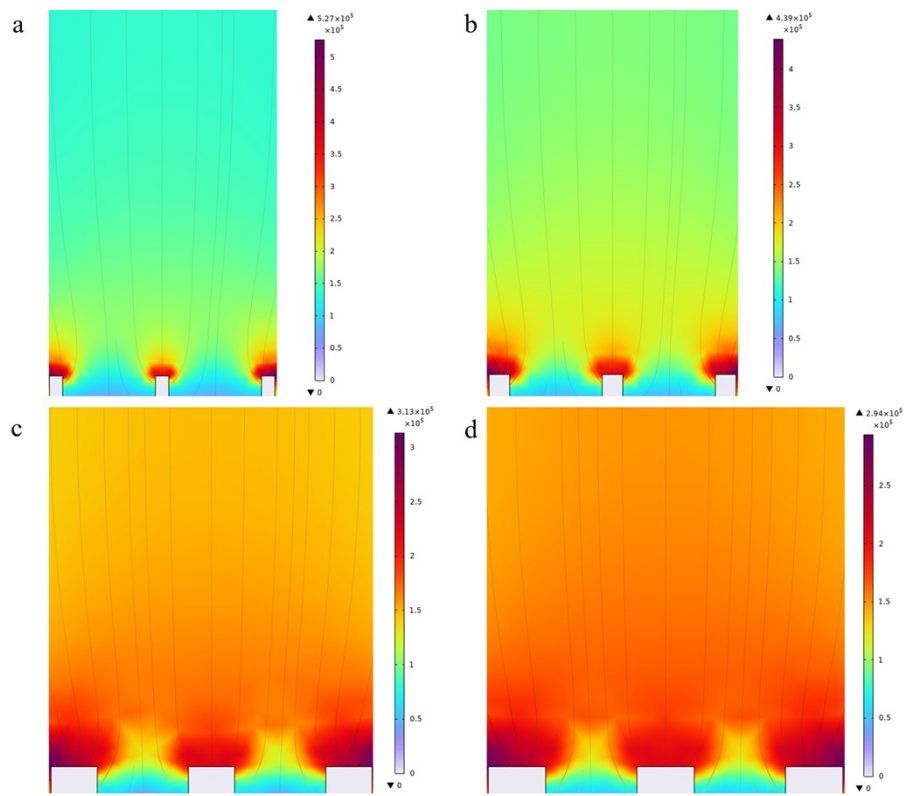

**Figure S27.** Surface electric field intensity distributions of (a)  $\text{Ni}_x\text{Mo}_y\text{-MoO}_2@\text{NF-5}$ , (b)  $\text{Ni}_x\text{Mo}_y\text{-MoO}_2@\text{NF-6}$ , (c)  $\text{Ni}_x\text{Mo}_y\text{-MoO}_2@\text{NF-8}$ , and (d)  $\text{Ni}_x\text{Mo}_y\text{-MoO}_2@\text{NF-9}$ .

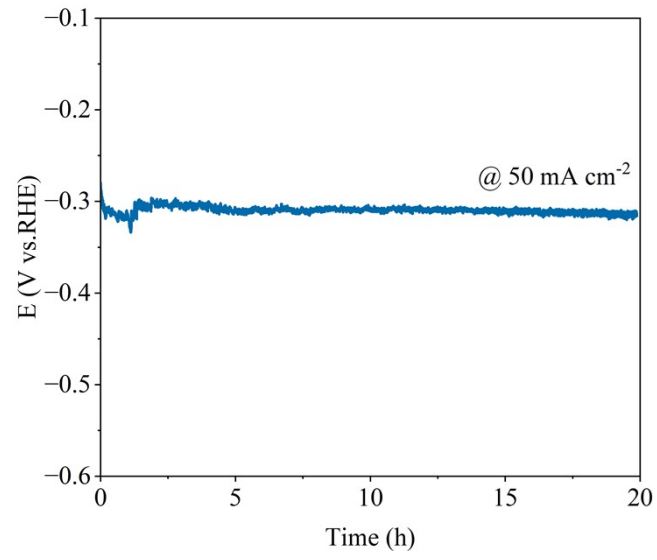

**Figure S28.**  $E-t$  curves of  $\text{Ni}_x\text{Mo}_y\text{-MoO}_2\text{@NF}$  in natural seawater.

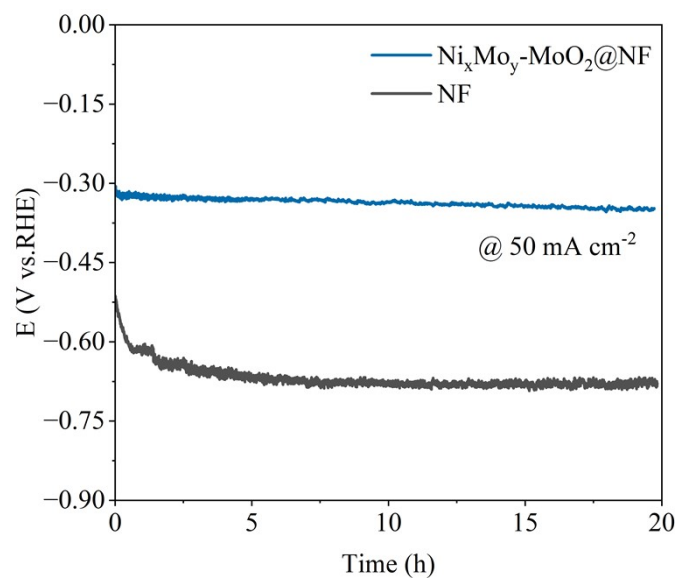

**Figure S29.**  $E-t$  curves of  $\text{Ni}_x\text{Mo}_y\text{-MoO}_2\text{@NF}$  and NF in chloride-free artificial seawater.

The chloride-free artificial seawater was prepared by replacing the chloride ions in seawater with an equivalent amount of sulfate ions.

**Table S1.** Comparison of the HER performance for Ni<sub>x</sub>Mo<sub>y</sub>-MoO<sub>2</sub>@NF with other reported highly active HER electrocatalysts in nature seawater.

| Electrocatalyst                                       | Electrolyte                | j (mA cm <sup>-2</sup> ) | η (mV) | Ref.                                                      |
|-------------------------------------------------------|----------------------------|--------------------------|--------|-----------------------------------------------------------|
| Ni <sub>x</sub> Mo <sub>y</sub> -MoO <sub>2</sub> @NF | Seawater                   | 10                       | 123    | This work                                                 |
|                                                       | Seawater                   | 100                      | 407    | This work                                                 |
| Fe <sub>3</sub> P-NiSe <sub>2</sub> NFs               | Seawater                   | 10                       | 170    | Adv. Mater. 2021                                          |
| Fe <sub>3</sub> P-NiSe <sub>2</sub> NFs               | Seawater                   | 100                      | 645    | Adv. Mater. 2021                                          |
| CeO <sub>2</sub> /α-MoC/β-MO <sub>2</sub> C           |                            |                          |        |                                                           |
| MRs/CC                                                | Seawater                   | 10                       | 225    | Appl. Catal. B Environ. 2022                              |
| NPNS                                                  | Seawater                   | 10                       | 144    | Appl. Catal. B Environ. 2019                              |
|                                                       | Seawater<br>(Ar-saturated) |                          |        |                                                           |
| Mo <sub>5</sub> N <sub>6</sub>                        | Seawater                   | 10                       | 257    | ACS Nano 2018                                             |
| PtRuMo                                                | Seawater                   | 10                       | 260    | J. Mater. Chem. A 2016<br>ACS Sustainable Chem. Eng. 2019 |
| 0.5Rh-Gs1000                                          | Seawater                   | 10                       | 320    | Eng. 2019                                                 |
| Mn-NiO-Ni/Ni-F                                        | Seawater                   | 10                       | 170    | Energy Environ. Sci. 2018                                 |
|                                                       | Seawater<br>(pH=8.4)       | 10                       | 287    | ACS Appl. Energy Mater. 2019                              |
| NiCoP/NF                                              | Seawater                   | 10                       | 165    | ACS Energy Lett. 2020                                     |
| NiCoN/NixP/NiCoN                                      | Seawater                   | 100                      | 890    | Electrochim. Acta 2016                                    |
| RuCo                                                  | Seawater<br>(pH=7.4)       | 10                       | 486    | Chem. Eng. J. 2022                                        |
|                                                       | Seawater<br>(pH=7.8)       | 10                       | 489    | J. Energy Chem. 2021                                      |
| Fe-Co <sub>2</sub> P BNRs                             | Seawater<br>(pH=7.8)       | 10                       | 749    | J. Energy Chem. 2021                                      |
| 20% Pt/C                                              | Seawater                   | 10                       | 162    | Chem. Eng. J. 2024                                        |
| CoFeOF/NF                                             | Seawater                   | 10                       | 306    | Adv. Energy Mater. 2019                                   |
| Co <sub>0.31</sub> Mo <sub>1.69</sub> C/MXene/NC      | Seawater                   | 10                       | 297    | Adv. Energy Mater. 2019                                   |
| Pt/C                                                  | Seawater                   | 10                       | 458    | Energy Environ. Sci. 2017                                 |
| CoMoP@C                                               | Seawater                   | 10                       | 345    | Energy Environ. Sci. 2017                                 |
| 20% Pt/C                                              | Seawater                   | 10                       | 276    | Energy Environ. Sci. 2017                                 |
| 40% Pt/C                                              | Seawater                   |                          |        | ACS Appl. Energy Mater. 2019                              |
| PF-NiCoP/NF                                           | Seawater                   | 10                       | 287    | 2019                                                      |
|                                                       | Seawater<br>(pH=7.2)       | 10                       | 165    | ACS Energy Letters 2020                                   |
| NiCoN NixP NiCoN                                      | Seawater<br>(pH=7.2)       | 10                       | 90     | ACS Energy Letters 2020                                   |
| Pt/C                                                  | Seawater<br>(pH=7.2)       | 10                       | 432    | ACS Energy Letters 2020                                   |
| NF                                                    | Seawater<br>(pH=7.2)       | 10                       | 144    | Appl. Catal. B 2019                                       |
| Ni <sub>5</sub> P <sub>4</sub> @NiOOH                 | Seawater                   | 10                       |        |                                                           |

|                                       |          |    |     |                                                              |
|---------------------------------------|----------|----|-----|--------------------------------------------------------------|
| Mn doped Ni/NiO                       | Seawater | 10 | 170 | Energy Environ. Sci. 2018                                    |
| Co <sub>3</sub> Mo <sub>3</sub> C/CNT | Seawater | 10 | 170 | RSC Adv. 2016                                                |
| Pt-Ru-Mo                              | Seawater | 10 | 196 | J. Mater. Chem. A 2016<br>ACS Sustainable Chem.<br>Eng. 2019 |
| Rh/N,S-C                              | Seawater | 10 | 320 | Eng. 2019                                                    |
| Mo <sub>2</sub> C/MoP/N,P-C           | Seawater | 10 | 346 | Electrochim. Acta 2018                                       |
| Ru-Co                                 | Seawater | 10 | 387 | Electrochim. Acta 2016                                       |
| Pt-NiCu alloy                         | Seawater | 10 | 267 | Nano Letters 2024                                            |
| CoNiP/CoxP                            | Seawater | 10 | 290 | Small 2021                                                   |
| Pt/WO <sub>2</sub>                    | Seawater | 10 | 290 | J. Am. Chem. Soc. 2024<br>Int. J. of Hydrogen Energy<br>2023 |
| Ru, W-NiSe <sub>2</sub> /NF           | Seawater | 10 | 353 | 2023                                                         |
| C-WC-RuMg                             | Seawater | 10 | 180 | J. Mater. Chem. A 2024                                       |

---

**Table S2.** Comparison of the HER performance for Ni<sub>x</sub>Mo<sub>y</sub>-MoO<sub>2</sub>@NF with other reported highly active HER electrocatalysts in alkaline seawater.

| Catalyst                                                                          | Electrolyte       | j (mA cm <sup>-2</sup> ) | η (mV) | Ref                              |
|-----------------------------------------------------------------------------------|-------------------|--------------------------|--------|----------------------------------|
| Ni <sub>x</sub> Mo <sub>y</sub> -MoO <sub>2</sub> @NF                             | 1M KOH+seawater   | 100                      | 83     | This work                        |
| NiTe@FeOOH                                                                        | 1M KOH+seawater   | 100                      | 280    | Chem. Eng. J. 2023               |
| Pt/C                                                                              | 1M KOH+seawater   | 100                      | 164    | Chem. Eng. J. 2023               |
| S,P-(Ni,Mo,Fe)OOH/NiMoP/wood aerogel                                              | 1M KOH+seawater   | 100                      | 212    | Appl. Catal. B Environ. 2021     |
| Ni@CNTs-MoxC/Ni <sub>2</sub> P                                                    | 1M KOH+seawater   | 100                      | 180    | Nano Energy 2023                 |
| Pt/C                                                                              | 1M KOH+seawater   | 100                      | 96     | Nano Energy 2023                 |
| NiFeS/NF                                                                          | 1M KOH+seawater   | 100                      | 217    | J. Mater. Chem. A 2023           |
| Pt-Ni <sub>3</sub> N@V <sub>2</sub> O <sub>3</sub> /NF (1.4 mg cm <sup>-2</sup> ) | 1M KOH+seawater   | 100                      | 47     | Sci. Adv. 2024                   |
| Pt-C/NF (1.4 mg cm <sup>-2</sup> )                                                | 1M KOH+seawater   | 100                      | 109    | Sci. Adv. 2024                   |
| Ni <sub>3</sub> N@C/NF (4.0 mg cm <sup>-2</sup> )                                 | 1M KOH+seawater   | 100                      | 142    | J. Mater. Chem. A 2021           |
| Fe <sub>0.01</sub> -Ni&Ni <sub>0.2</sub> Mo <sub>0.8</sub> N                      | 1M KOH+seawater   | 100                      | 100    | Energy Environ. Sci. 2022        |
| NiCoHPi@Ni <sub>3</sub> N/NF (5.4 mg cm <sup>-2</sup> )                           | 1M KOH+seawater   | 100                      | 182    | ACS Appl. Mater. Interfaces 2022 |
| NiMoN@NiFeN                                                                       | 1M KOH+seawater   | 100                      | 82     | Nat. Commun. 2019                |
| NiPS/NF                                                                           | 1M KOH+seawater   | 100                      | 329    | J. Energy Chem. 2022             |
| Fe/F-Ni <sub>2</sub> P@NC                                                         | 1M KOH+seawater   | 100                      | 212    | Chem. Eng. J. 2023               |
| Ni-SA/NC (0.5 mg cm <sup>-2</sup> )                                               | 1M KOH+seawater   | 100                      | 139    | Adv. Mater. 2020                 |
| HPS-NiMo                                                                          | Alkaline seawater | 100                      | 171    | ACS Nano 2024                    |
| Fe <sub>3</sub> Se <sub>4</sub> /NiSe <sub>2</sub> @Mxene                         | 1M KOH+seawater   | 100                      | 240    | Adv. Funct. Mater. 2025          |

|                                           |                      |     |     |                                 |
|-------------------------------------------|----------------------|-----|-----|---------------------------------|
| RuCo-CoFe <sub>2</sub> O <sub>4</sub> @IF | 1M KOH+seawater      | 100 | 184 | Chem. Eng. J.<br>2025           |
| P-Fe <sub>3</sub> O <sub>4</sub> -x       | 1M KOH+seawater      | 100 | 200 | Appl. Catal. B<br>Environ. 2025 |
| FeNiP-NPHC                                | 1M KOH+seawater      | 100 | 180 | Adv. Funct.<br>Mater. 2022      |
| Cr-Co <sub>x</sub> P                      | 1M KOH+seawater      | 100 | 194 | Adv. Funct.<br>Mater. 2023      |
| Ni <sub>2</sub> P-Fe <sub>2</sub> P/NF    | 1M KOH+seawater      | 100 | 252 | Adv. Funct.<br>Mater. 2021      |
| CoPGT                                     | 1 M KOH + 0.6 M NaCl | 100 | 192 | Nat. Commun.<br>2023            |

---

**Table S3.** The primary species and the corresponding contents in seawater.

| Ions                          | Concentration (mmol/L) |
|-------------------------------|------------------------|
| Na <sup>+</sup>               | 459.7                  |
| K <sup>+</sup>                | 9.67                   |
| Mg <sup>2+</sup>              | 50.7                   |
| Ca <sup>2+</sup>              | 10.4                   |
| Cl <sup>-</sup>               | 535.3                  |
| SO <sub>4</sub> <sup>2-</sup> | 27                     |
| HCO <sub>3</sub> <sup>-</sup> | 2.36                   |

**Table S4.** EIS fitting parameters for the various electrodes.

| Electrode                                               | Rct    |
|---------------------------------------------------------|--------|
| NF                                                      | 43.490 |
| Ni <sub>x</sub> Mo <sub>y</sub> -MoO <sub>2</sub> @NF   | 0.380  |
| Ni <sub>x</sub> Mo <sub>y</sub> -MoO <sub>2</sub> @NF-5 | 0.330  |
| Ni <sub>x</sub> Mo <sub>y</sub> -MoO <sub>2</sub> @NF-6 | 0.365  |
| Ni <sub>x</sub> Mo <sub>y</sub> -MoO <sub>2</sub> @NF-8 | 0.392  |
| Ni <sub>x</sub> Mo <sub>y</sub> -MoO <sub>2</sub> @NF-9 | 0.423  |
| NiMoO <sub>x</sub> @NF                                  | 89.600 |

## References:

- 1 J. Chang, G. Wang, Z. Yang, B. Li, Q. Wang, R. Kuliiev, N. Orlovskaya, M. Gu, Y. Du, G. Wang, Y. Yang, *Adv. Mater.* **2024**, *36*, 2400558.
- 2 M. Hu, H. Chen, B. Liu, X. Xu, B. Cao, P. Jing, J. Zhang, R. Gao, J. Zhang, *Appl. Catal. B* **2024**, *342*, 123456.
- 3 Y. Huang, L. Hu, R. Liu, Y. Hu, T. Xiong, W. Qiu, M. Balogun, A. Pan, Y. Tong, *Appl. Catal. B* **2019**, *251*, 181.
- 4 H. Jin, X. Liu, A. Vasileff, Y. Jiao, Y. Zhao, Y. Zheng, S.-Z. Qiao, *ACS Nano* **2018**, *12*, 12761.
- 5 H. Li, Q. Tang, B. He, P. Yang, *J. Mater. Chem. A* **2016**, *4*, 6513.
- 6 Y. Liu, X. Hu, B. Huang, Z. Xie, *ACS Sustainable Chem. Eng.* **2019**, *7*, 18835.
- 7 X. Lu, J. Pan, E. Lovell, T. H. Tan, Y. H. Ng, R. Amal, *Energy Environ. Sci.* **2018**, *11*, 1898.
- 8 Q. Lv, J. Han, X. Tan, W. Wang, L. Cao, B. Dong, *ACS Appl. Energy Mater.* **2019**, *2*, 3910.
- 9 L. Yu, L. Wu, S. Song, B. McElhenny, F. Zhang, S. Chen, Z. Ren, *ACS Energy Lett.* **2020**, *5*, 2681.
- 10 X. Niu, Q. Tang, B. He, P. Yang, *Electrochim. Acta* **2016**, *208*, 180.
- 11 X. Bu, X. Liang, Y. Bu, Q. Quan, Y. Meng, Z. Lai, W. Wang, C. Liu, J. Lu, C.-M. L. Wu, J. C. Ho, *Chem. Eng. J.* **2022**, *435*, 135379.
- 12 Y. Lin, K. Sun, X. Chen, C. Chen, Y. Pan, X. Li, J. Zhang, *J. Energy Chem.* **2021**, *55*, 92.
- 13 S. A. Patil, A. C. Khot, V. D. Chavan, I. Rabani, D.-k. Kim, J. Jung, H. Im, N. K. Shrestha, *Chem. Eng. J.* **2024**, *480*, 146545.
- 14 X. H. Wu, S. Zhou, Z. Y. Wang, J. S. Liu, W. Pei, P. J. Yang, J. J. Zhao, J. S. Qiu, *Adv. Energy Mater.* **2019**, *9*, 1901333.
- 15 Y. Ma, C. Wu, X. Feng, H. Tan, L. Yan, Y. Liu, Z. Kang, E. Wang, Y. Li, *Energy Environ.*

- Sci.* **2017**, *10*, 788.
- 16 Y. Zhao, Q. Tang, B. He, P. Yang, *RSC Adv.* **2016**, *6*, 93267.
  - 17 T. Liu, H. Liu, X. Wu, Y. Niu, B. Feng, W. Li, W. Hu, C.M. Li, *Electrochim. Acta* **2018**, *281*, 710.
  - 18 L. Yi, X. Chen, Y. Wen, H. Chen, S. Zhang, H. Yang, W. Li, L. Zhou, B. Xu, W. Xu, W. Guan, S. Dai, Z. Lu, *Nano Lett.* **2024**, *24*, 5920.
  - 19 D. Liu, H. Ai, M. Chen, P. Zhou, B. Li, D. Liu, X. Du, K. H. Lo, K. W. Ng, S. Wang, S. Chen, G. Xing, J. Hu, H. Pan, *Small* **2021**, *17*, 2007557.
  - 20 D. Bao, L. Huang, Y. Gao, K. Davey, Y. Zheng, S.-Z. Qiao, *J. Am. Chem. Soc.* **2024**, *146*, 34711.
  - 21 Y. Dang, G. Wang, X. Li, X. Ma, F. Yue, C. Wang, L. Gao, F. Fu, *Int. J. Hydrogen Energy* **2023**, *48*, 17035.
  - 22 H. Wu, Z. Zhao, M. Wang, W. Zheng, Y. Zhang, Y. Wang, T. Ma, Z. Zeng, C. Cheng, S. Li, *J. Mater. Chem. A* **2024**, *12*, 10755.
  - 23 X. Gao, J. Chen, Y. Yu, F. Wang, X. Wu, X. Wang, W. Mao, J. Li, W. Huang, Q. Chen, R. Li, C. You, S. Wang, X. Tian, Z. Kang, *Chem. Eng. J.* **2023**, *474*, 145568.
  - 24 H. Chen, Y. Zou, J. Li, K. Zhang, Y. Xia, B. Hui, D. Yang, *Appl. Catal. B* **2021**, *293*, 120215.
  - 25 Y. Wang, Z. Zhang, X. Li, J. Liu, H. Chen, L. Sun, *J. Mater. Sci. Technol.* **2024**, *188*, 145.
  - 26 J. Chen, L. Zhang, J. Li, X. He, Y. Zheng, S. Sun, X. Fang, D. Zheng, Y. Luo, Y. Wang, J. Zhang, L. Xie, Z. Cai, Y. Sun, A. A. Alshehri, Q. Kong, C. Tang, X. Sun, *J. Mater. Chem. A* **2023**, *11*, 1116.
  - 27 H. Hu, Z. Zhang, L. Liu, X. Che, J. Wang, Y. Zhu, J. P. Attfield, M. Yang, *Sci. Adv.* **2024**, *10*, eadn7012.
  - 28 B. Wang, M. Lu, D. Chen, Q. Zhang, W. Wang, Y. Kang, Z. Fang, G. Pang, S. Feng, *J. Mater. Chem. A* **2021**, *9*, 13562.
  - 29 M. Ning, F. Zhang, L. Wu, X. Xing, D. Wang, S. Song, Q. Zhou, L. Yu, J. Bao, S. Chen, Z. Ren, *Energy Environ. Sci.* **2022**, *15*, 3945.
  - 30 H. Sun, J. Sun, Y. Song, Y. Zhang, Y. Qiu, M. Sun, X. Tian, C. Li, Z. Lv, L. Zhang, *ACS Appl. Mater. Interfaces* **2022**, *14*, 22061.
  - 31 L. Yu, Q. Zhu, S. Song, B. McElhenny, D. Wang, C. Wu, Z. Qin, J. Bao, Y. Yu, S. Chen, Z. Ren, *Nat. Commun.* **2019**, *10*, 5106.
  - 32 H.-Y. Wang, J.-T. Ren, L. Wang, M.-L. Sun, H.-M. Yang, X.-W. Lv, Z.-Y. Yuan, *J. Energy Chem.* **2022**, *75*, 66.
  - 33 W. Zhang, X. Liu, Q. Yu, X. Wang, H. Mao, J. Chi, B. Li, J. Wan, L. Wang, *Chem. Eng. J.* **2023**, *453*, 140210.
  - 34 W. Zang, T. Sun, T. Yang, S. Xi, M. Waqar, Z. Kou, Z. Lyu, Y. P. Feng, J. Wang, S. J. Pennycook, *Adv. Mater.* **2021**, *33*, 2003846.
  - 35 Y. Zhang, S. Jeong, E. Son, Y. Choi, S. Lee, J. M. Baik, H. Park, *ACS Nano* **2024**, *18*, 16312.

- 36 F. O. Boakye, F. u. Zaman, H. Zhang, A. Saeed, F. T. Dajan, S. Iqbal, K. Harrath, *Adv. Funct. Mater.* **2025**, *35*, 2424718.
- 37 X. Wei, Y. Huang, Q. Wang, L. Dang, K. Zhang, Q. Guo, W. Li, T. Ai, S. Wang, *Chem. Eng. J.* **2025**, *503*, 158346.
- 38 Q. Yu, Y. Fu, Z. Liu, X. Liu, L. Guo, T. Wang, J. Chi, Z. Wu, L. Wang, *Appl. Catal. B* **2025**, *361*, 124598.
- 39 Q. Yu, X. Liu, G. Liu, X. Wang, Z. Li, B. Li, Z. Wu, L. Wang, *Adv. Funct. Mater.* **2022**, *32*, 2205767.
- 40 Y. Song, M. Sun, S. Zhang, X. Zhang, P. Yi, J. Liu, B. Huang, M. Huang, L. Zhang, *Adv. Funct. Mater.* **2023**, *33*, 2214081.
- 41 L. Wu, L. Yu, F. Zhang, B. McElhenny, D. Luo, A. Karim, S. Chen, Z. Ren, *Adv. Funct. Mater.* **2021**, *31*, 2006484.
- 42 X. Xu, Y. Lu, J. Shi, X. Hao, Z. Ma, K. Yang, T. Zhang, C. Li, D. Zhang, X. Huang, Y. He, *Nat. Commun.* **2023**, *14*, 7708.
